# Supplementary material for: NaBiF4 upconversion nanoparticle-based electrochemiluminescent biosensor for E. coli O157 : H7 detection
Source: Royal Society of Chemistry journal article supplement (doi:10.1039/d2ra05217b), 2022-01-01
Supplement: d2ra05217b1.pdf [file d2ra05217b1.pdf]

## Supporting Information

### **NaBiF<sub>4</sub> Upconversion Nanoparticle-based Electrochemiluminescent Biosensor for *E. coli* O157:H7 Detection**

Danqing Liu,<sup>\*a</sup> Xingxing Lv,<sup>a</sup> Chaoyue Zhao,<sup>a</sup> Jiayue Li,<sup>a</sup> Jinmei Huang,<sup>a</sup> Ling  
Weng,<sup>\*a</sup> Liangcan He<sup>\*b</sup> and Shaoqin Liu<sup>b</sup>

<sup>a</sup> School of Material Science and Chemical Engineering, Harbin University of Science  
and Technology, Harbin 150040, China.

<sup>b</sup> Key Laboratory of Micro-systems and Micro-structures Manufacturing of Ministry  
of Education, Harbin Institute of Technology, Harbin 150001, China.

Corresponding author: danqingliu76@163.com (Danqing Liu)

wengling79@163.com (Ling Weng)

liangcanhe@hit.edu.cn (Liangcan He)

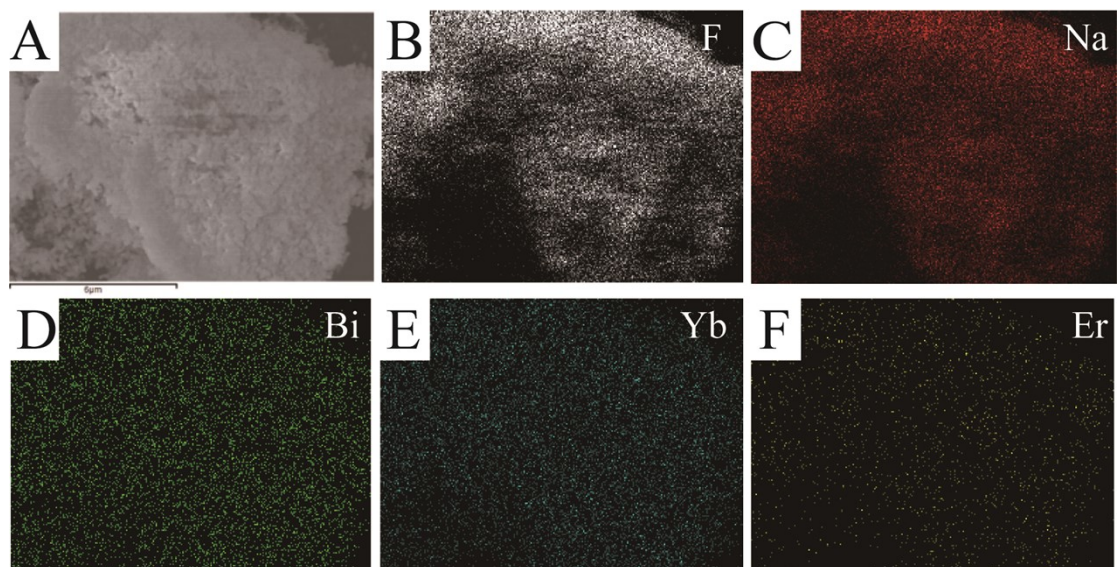

**Figure S1.** SEM elemental mapping of (B) F, (C) Na, (D) Bi, (E) Yb and (F) Er according to (A) the original SEM image of  $\text{NaBiF}_4:\text{Yb}^{3+}/\text{Er}^{3+}$  UCNPs.

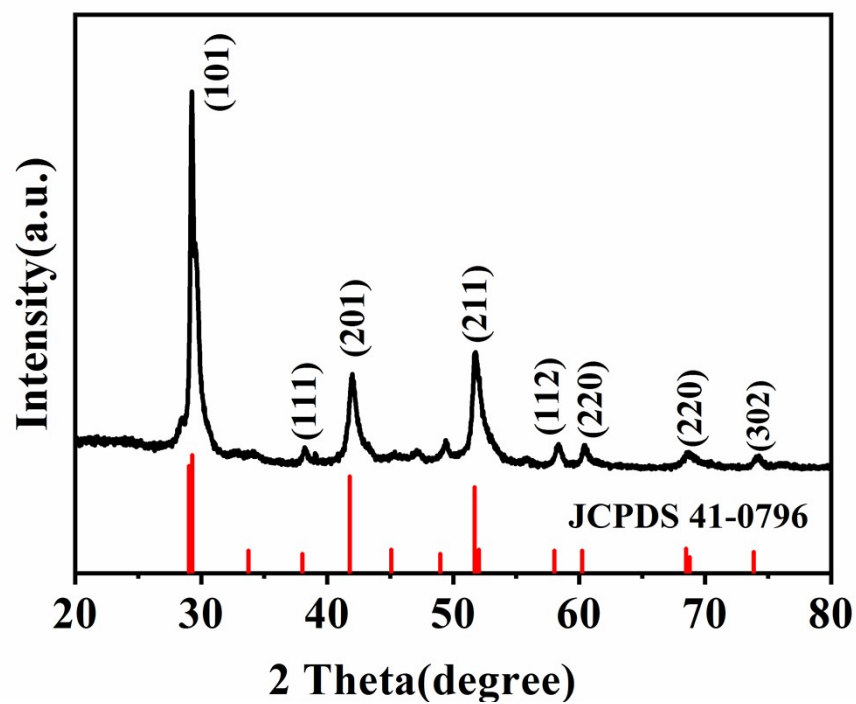

**Figure S2.** XRD pattern of NaBiF<sub>4</sub>:Yb<sup>3+</sup>/Er<sup>3+</sup> UCNPs in comparison with the standard peaks of hexagonal phase NaBiF<sub>4</sub>.

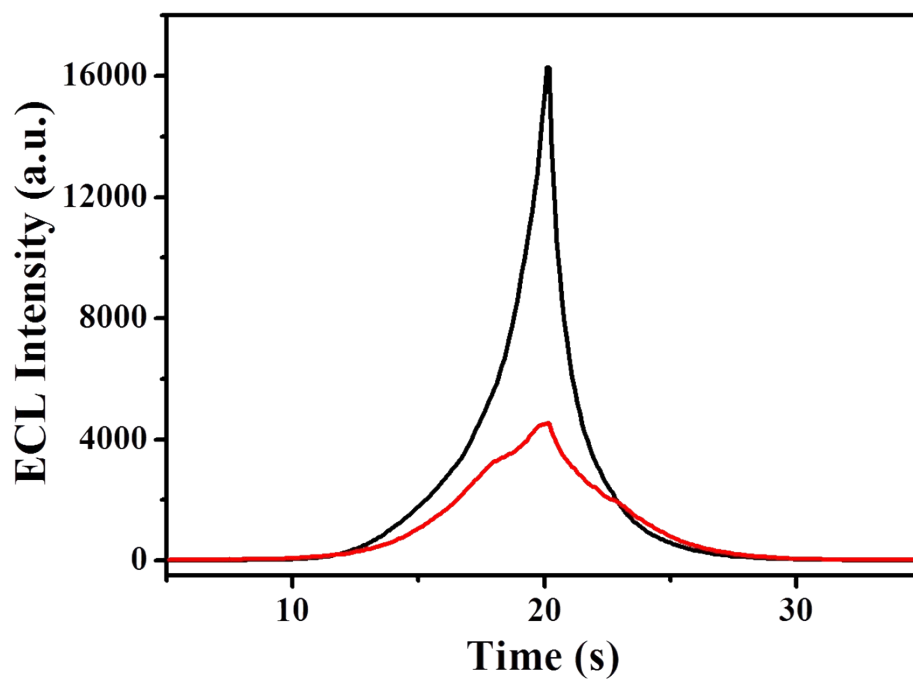

**Figure S3.** Comparison of ECL intensity of NaBiF<sub>4</sub>:Yb<sup>3+</sup>/Er<sup>3+</sup> UCNPs in PBS (0.1 M, pH 7.4) with (black curve) or without 0.1 M K<sub>2</sub>S<sub>2</sub>O<sub>8</sub> (red curve). The scan rate was 100 mV s<sup>-1</sup> and the PMT voltage was 800 V, respectively.

**Table S1** Comparison of ECL intensity for different materials with or without doping elements.

| <b>materials</b>                                             | <b>ECL intensity (a.u.)</b> |
|--------------------------------------------------------------|-----------------------------|
| NaBiF <sub>4</sub> :Yb <sup>3+</sup> /Er <sup>3+</sup> UCNPs | 14600±114.2                 |
| NaBiF <sub>4</sub> :Yb <sup>3+</sup> UCNPs                   | 3500±56.8                   |
| NaBiF <sub>4</sub> UCNPs                                     | 440±15.6                    |

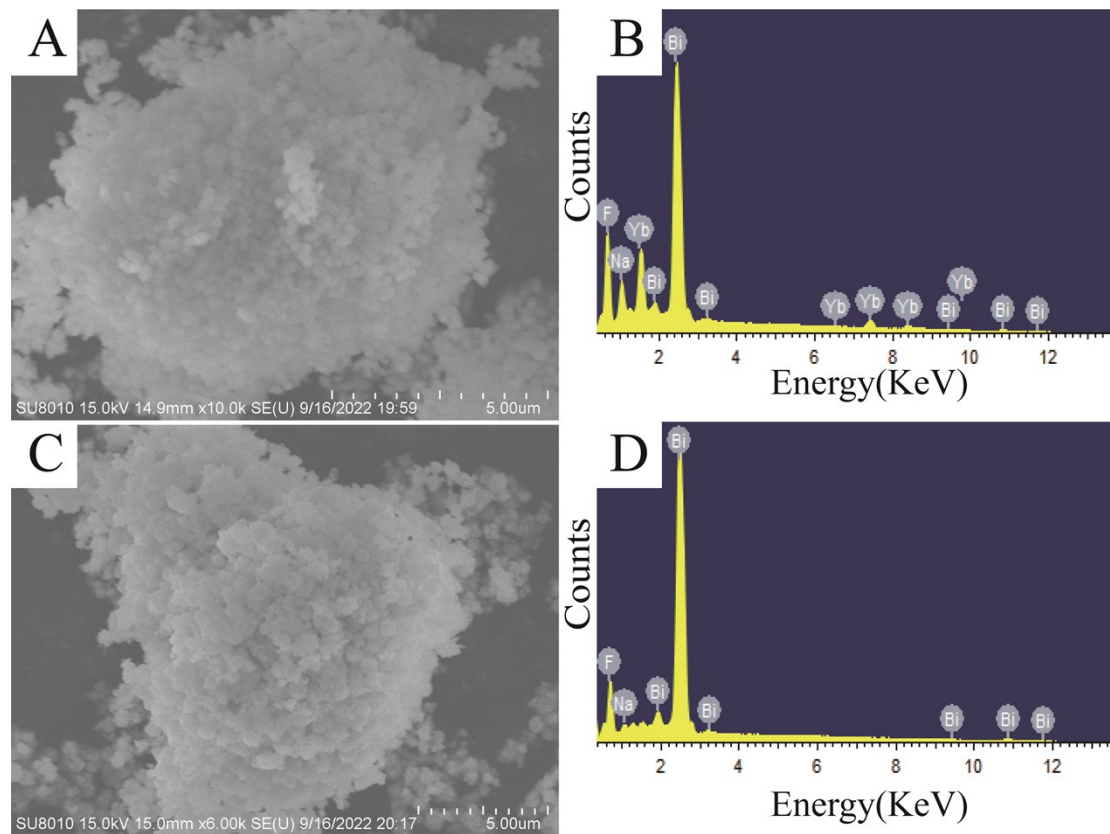

**Figure S4.** (A) SEM image and (B) EDS of NaBiF<sub>4</sub>:Yb<sup>3+</sup> UCNPs, (C) SEM image and (D) EDS of NaBiF<sub>4</sub> UCNPs

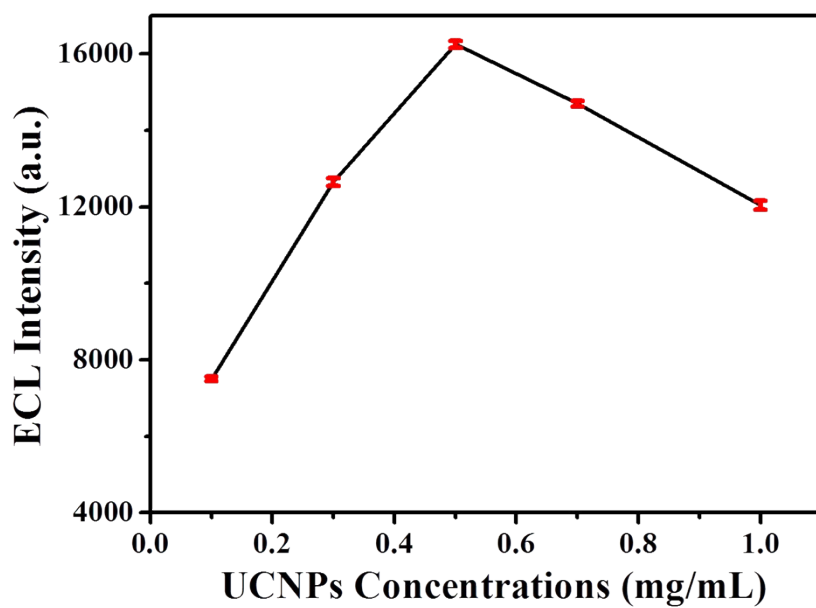

**Figure S5.** Effect of the concentration of UCNPs solution on ECL intensity of NaBiF<sub>4</sub>:Yb<sup>3+</sup>/Er<sup>3+</sup> UCNPs/GCE. Electrolyte: PBS (0.1 M, pH 7.4) with 0.1 M K<sub>2</sub>S<sub>2</sub>O<sub>8</sub>. The scan rate was 100 mV s<sup>-1</sup> and the PMT voltage was 800 V, respectively..

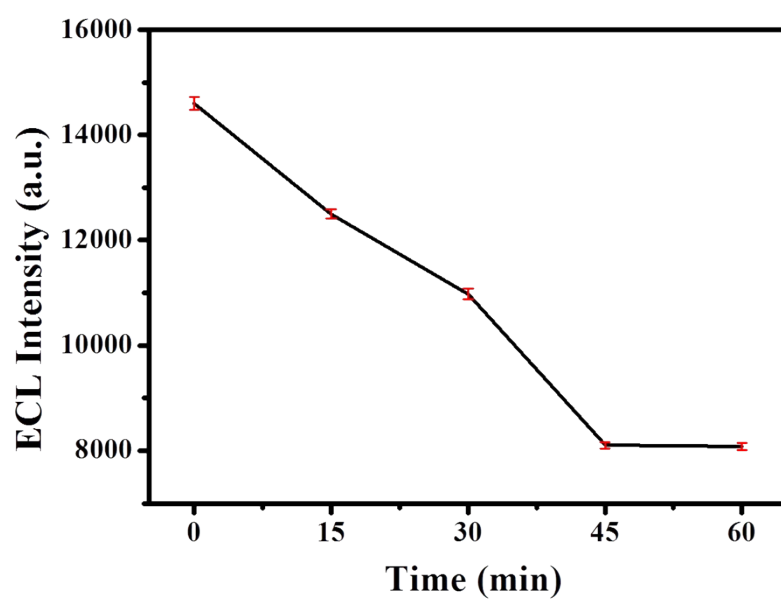

**Figure S6.** Effect of incubation time on ECL intensity of *E. coli* O157:H7 antibody/Au/NaBiF<sub>4</sub>:Yb<sup>3+</sup>/Er<sup>3+</sup> UCNPs/GCE. The electrode was incubated with 10<sup>4</sup> CFU mL<sup>-1</sup> *E. coli* O157:H7 suspension solution for 0, 15, 30, 45 and 60 min. Electrolyte: PBS (0.1 M, pH 7.4) with 0.1 M K<sub>2</sub>S<sub>2</sub>O<sub>8</sub>. The scan rate was 100 mV s<sup>-1</sup> and the PMT voltage was 800 V, respectively.



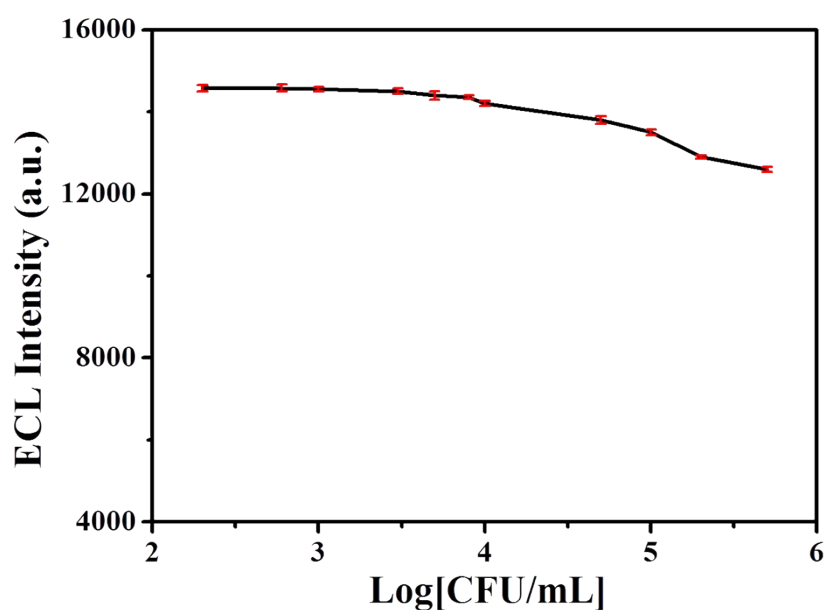

**Figure S7.** The relationship between the ECL peak intensity and the logarithm of *E. coli* Top 10 concentrations with the anti- *E. coli* O157:H7/Au/ NaBiF<sub>4</sub>:Yb<sup>3+</sup>/Er<sup>3+</sup> UCNPs/GCE incubated with *E. coli* Top 10. The concentrations of *E. coli* Top 10 is 200, 600, 1000, 3000, 5000, 8000, 10000, 50000, 100000, 200000 and 500000 CFU mL<sup>-1</sup>, respectively. Error bar=RSD (n=5).

**Table S2** The long-time stability of as-prepared biosensors.

| <b>samples</b> | <b>ECL intensity<br/>(0 day, a.u.)</b> | <b>ECL intensity<br/>(7 day, a.u.)</b> | <b>ECL intensity<br/>(14 day, a.u.)</b> | <b>Percentage of<br/>remained<br/>intensity</b> |
|----------------|----------------------------------------|----------------------------------------|-----------------------------------------|-------------------------------------------------|
| Biosensor 1    | 14680                                  | 14331                                  | 13800                                   | 94%                                             |
| Biosensor 2    | 14640                                  | 14108                                  | 13545                                   | 92.5%                                           |
| Biosensor 3    | 14515                                  | 14240                                  | 13710                                   | 94.5%                                           |

**Table S3** The selectivity and specificity of the biosensor.

| <b>samples</b>                  | <b>Incubated bacteria<br/>(CFU/mL)</b>                                                                       | <b>ECL intensity<br/>(a.u.)</b> | <b>RSD<br/>comparing<br/>with blank</b> |
|---------------------------------|--------------------------------------------------------------------------------------------------------------|---------------------------------|-----------------------------------------|
| Biosensor with antibody<br>1    | <i>E. coli</i> O157:H7, <i>E. coli</i><br>JM109, <i>E. coli</i> DH5 $\alpha$ and <i>E. coli</i><br>Top, 1000 | 11243 $\pm$ 82.7                | 2.4%                                    |
| Biosensor with antibody<br>2    | <i>E. coli</i> O157:H7,<br>1000                                                                              | 11520 $\pm$ 103.9               |                                         |
| Biosensor without<br>antibody 1 | <i>E. coli</i> O157:H7,<br>10000                                                                             | 15359 $\pm$ 95.6                | 4.6%                                    |
| Biosensor without<br>antibody 2 | <i>E. coli</i> Top 10, 10000                                                                                 | 15327 $\pm$ 112.3               | 4.8%                                    |
| Biosensor without<br>antibody 3 | No                                                                                                           | 16100 $\pm$ 125.6               |                                         |
